# Supplementary material for: Contribution of MMP14-expressing cancer-associated fibroblasts in the tumor immune microenvironment to progression of colorectal cancer
Source: PubMed Central journal article supplement (PMC9424903; doi:10.3389/fonc.2022.956270), 2022-08-16
Supplement: DataSheet_1.pdf [file DataSheet_1.pdf]

**Supplementary Table S1.** Details of the mIHC panel adopted in this study.

|                   | Round 1       | Round 2      | Round 3           | Round 4    | Round 5           | Round 6     | Round 7    |
|-------------------|---------------|--------------|-------------------|------------|-------------------|-------------|------------|
| Primary Ab        | [Hematoxylin] | CD80         | CD3               | CD31       | CD45              | CD33        | CD8        |
| Supplier          | Dako          | R&D Systems  | Thermo Scientific | Dako       | Thermo Scientific | Abcam       | Dako       |
| Clone/catalog#    | S3301         | MAB140-37711 | SP7               | JC70A      | H130              | SP266       | C8/144B    |
| Dilution          |               | 1:30         | 1:150             | Undiluted  | 1:100             | 1:50        | 1:100      |
| Reaction          | 1 min         | RT, 30 min   | RT, 30 min        | RT, 30 min | RT, 30 min        | RT, 30 min  | RT, 30 min |
| Histofine         |               | Anti-mouse   | Anti-rabbit       | Anti-mouse | Anti-mouse        | Anti-rabbit | Anti-mouse |
| Reaction          |               | RT, 30 min   | RT, 30 min        | RT, 30 min | RT, 30 min        | RT, 30 min  | RT, 30 min |
| AEC reaction time |               | 20 min       | 20 min            | 20 min     | 40 min            | 20 min      | 20 min     |

  

|                   | Round 8    | Round 9     | Round 10         | Round 11     | Round 12          | Round 13         |
|-------------------|------------|-------------|------------------|--------------|-------------------|------------------|
| Primary Ab        | CD68       | MMP14       | HLA-DR           | $\alpha$ SMA | CD163             | PanCK            |
| Supplier          | Abcam      | Abcam       | Novus Biological | Abcam        | Thermo Scientific | Leica Biosystems |
| Clone/catalog#    | PG-M1      | EP1264Y     | SPM288           | ab5694       | 10D6              | AE1/AE3          |
| Dilution          | 1:50       | 1:250       | 1:400            | 1:400        | 1:100             | 1:200            |
| Reaction          | RT, 30 min | RT, 30 min  | RT, 30 min       | RT, 30 min   | RT, 30 min        | RT, 30 min       |
| Histofine         | Anti-mouse | Anti-rabbit | Anti-mouse       | Anti-rabbit  | Anti-mouse        | Anti-mouse       |
| Reaction          | RT, 30 min | RT, 30 min  | RT, 30 min       | RT, 30 min   | RT, 30 min        | RT, 30 min       |
| AEC reaction time | 20 min     | 20 min      | 10 min           | 20 min       | 20 min            | 10 min           |

Abbreviations not defined in text: Ab, antibody; AEC, alcohol-soluble peroxidase substrate 3-aminomethyl carbazole; RT, room temperature.

**Supplementary Table S2.** Correlation between immune cell density in the TN and the MMP14<sup>+</sup> CAF/CAF ratio.

| Immune cell subset      | Spearman's correlation coefficient | <i>P</i> value |
|-------------------------|------------------------------------|----------------|
| CD3 <sup>+</sup> T cell | 0.111                              | 0.309          |
| CD8 <sup>+</sup> T cell | 0.089                              | 0.417          |
| M1-TAM                  | 0.210                              | 0.052          |
| M2-TAM                  | 0.334                              | 0.002          |
| MDSC                    | 0.162                              | 0.136          |

**Supplementary Table S3.** Correlation between immune cell density in the ISA and the MMP14<sup>+</sup> CAF/CAF ratio.

| Immune cell subset      | Spearman's correlation coefficient | <i>P</i> value |
|-------------------------|------------------------------------|----------------|
| CD3 <sup>+</sup> T cell | 0.149                              | 0.173          |
| CD8 <sup>+</sup> T cell | 0.038                              | 0.732          |
| M1-TAM                  | 0.093                              | 0.394          |
| M2-TAM                  | 0.394                              | <0.001         |
| MDSC                    | 0.103                              | 0.346          |

**Supplementary Figure S1.** Flow diagram for patient selection.

**Supplementary Figure S2.** Representative images of mIHC analysis. **(A)**

Hematoxylin and original alcohol-soluble peroxidase substrate 3-aminomethyl carbazole (AEC) staining images for mIHC analysis. Scale bar, 400  $\mu\text{m}$ . **(B)**

Representative hematoxylin images for the Tissue Segmentation method. Regions of interest were randomly selected for the invasive front (IF) and the center of the tumor (CT). The Tissue Segmentation method (17) was adopted to extract the intratumoral stromal area (ISA) and the tumor cell nest (TN) from CT. The same method was applied to extract IF as the area within 300  $\mu\text{m}$  external to the boundary of the tumor cell area with the surrounding connective tissue. **(C)** Cell distribution according to areas determined by Tissue Segmentation. The distribution of tumor cells ( $\text{CD31}^- \text{CD45}^- \text{PanCK}^+ \alpha\text{SMA}^-$ ) and CAFs ( $\text{CD31}^- \text{CD45}^- \text{PanCK}^- \alpha\text{SMA}^+$ ) was evaluated in the TN and ISA by FCS Express 7 Image Cytometry.

**Supplementary Figure S3.** Kaplan-Meier curves for RFS according to cell subsets.

**(A)** Kaplan-Meier curves for RFS based on median values of the  $\text{MMP14}^+$  TAM/TAM ratio (upper panels) or the  $\text{MMP14}^+$   $\text{CD3}^+$  T cell/ $\text{CD3}^+$  T cell ratio (lower panels) in the ISA (left panels) or the TN (right panels). **(B)** Kaplan-Meier curves for RFS based on the median value of overall CAF density. **(C and D)** Correlation between CAF density and M2-TAM density in the ISA (C) or TN (D). Each dot represents one patient. Regression lines are also shown in red.

**Supplementary Figure S4.** Relation between T cell distribution in tumor tissue and

RFS. **(A)** Kaplan-Meier curves for RFS based on the conventional Immunoscore. **(B**

**and C)** Kaplan-Meier curves for RFS based on the median values of  $\text{CD3}^+$  T cell (B)

or  $\text{CD8}^+$  T cell (C) density in the IF (left), ISA (middle), or TN (right) regions. **(D)** Box

plots for the proportion of CD3<sup>+</sup> T cells among CD45<sup>+</sup> cells in the IF, ISA, and TN regions. The boxes represent the median and upper and lower quartiles, and the whiskers represent the range. The *P* values were determined with the Steel-Dwass test. (E) Kaplan-Meier curves for RFS according to the IS-Immunoscore.

**Supplementary Figure S5.** Kaplan-Meier curves for RFS based on adjuvant chemotherapy regimens among patients with a high MMP14<sup>+</sup> CAF/CAF ratio relative to the median value. OX, oxaliplatin.
