# Supplementary material for: Contribution of MMP14-expressing cancer-associated fibroblasts in the tumor immune microenvironment to progression of colorectal cancer
Source: PubMed Central journal article supplement (PMC9424903; doi:10.3389/fonc.2022.956270), 2022-08-16

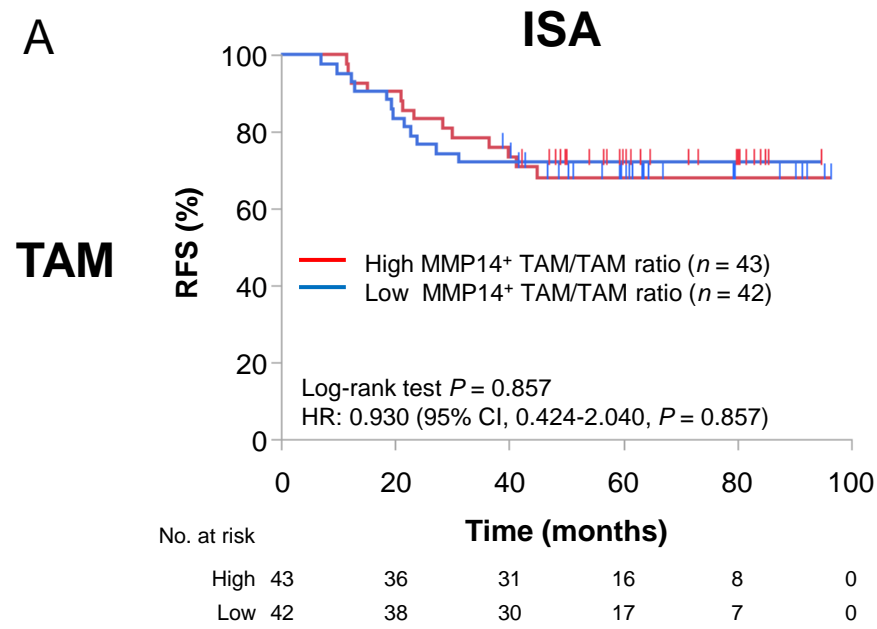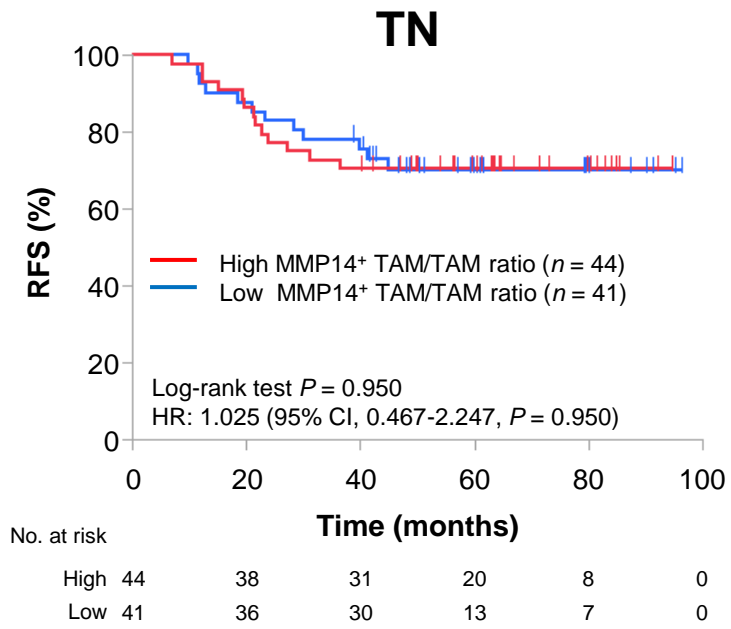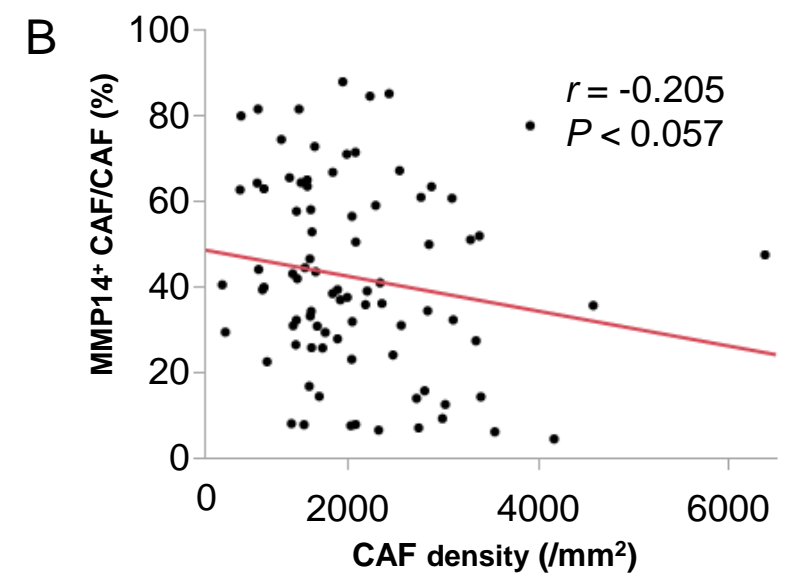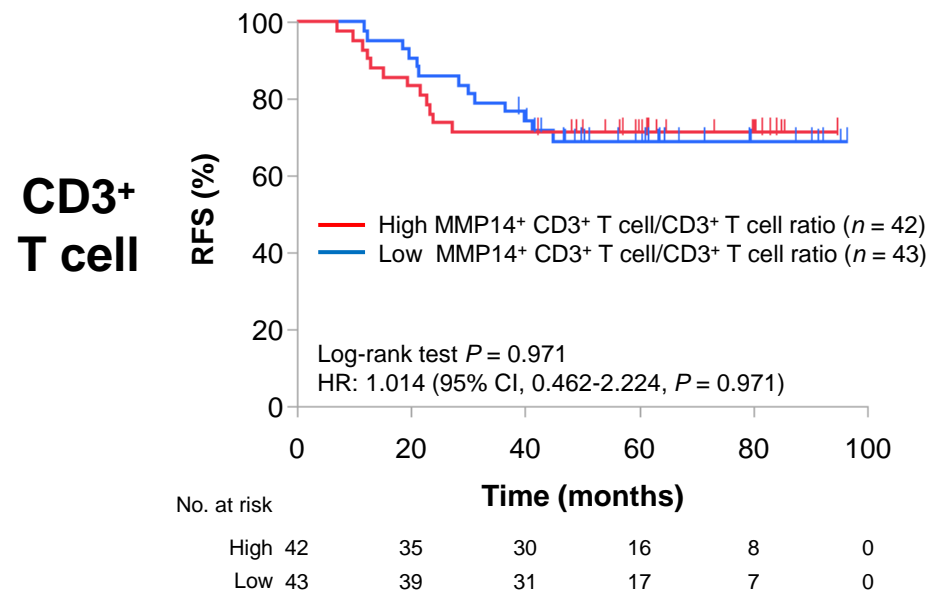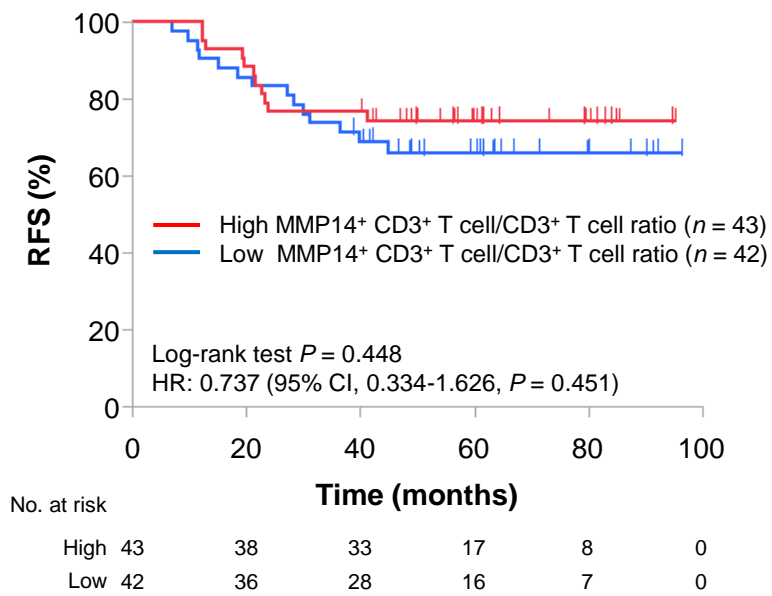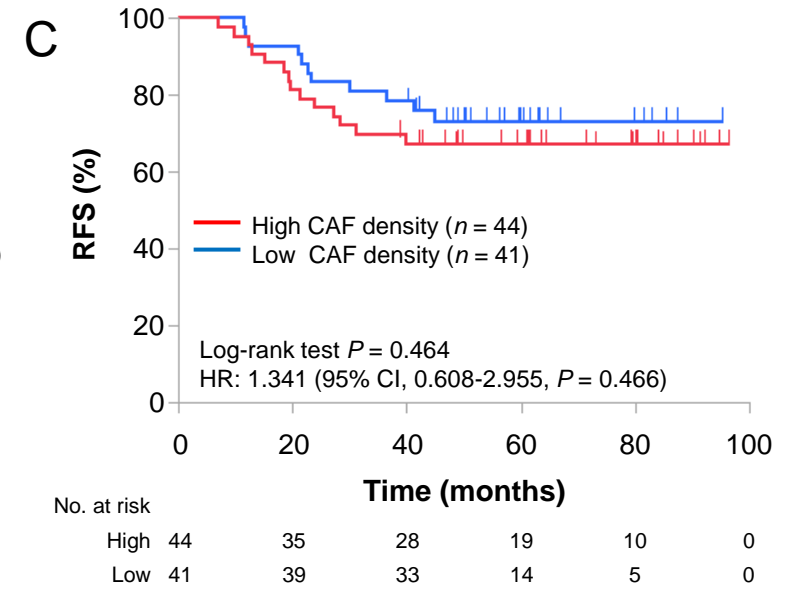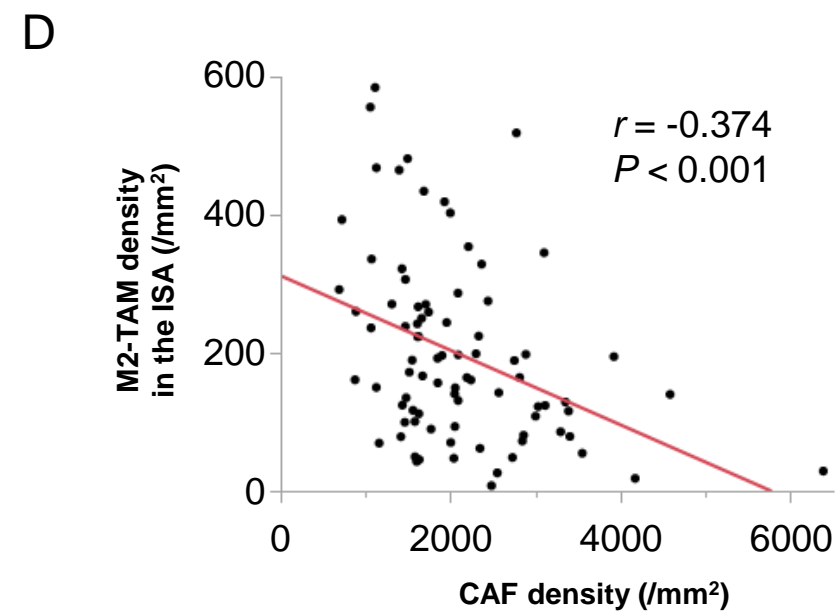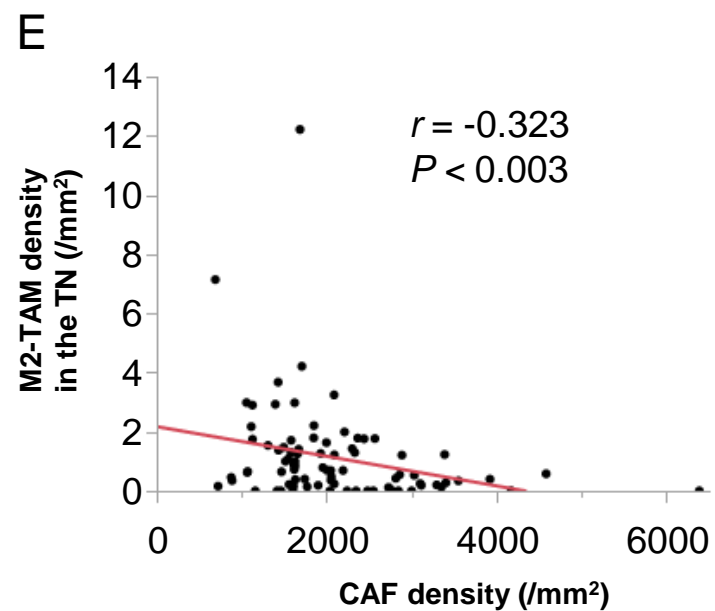

Supplement: Image_3.pdf [file Image_3.pdf]
